# Supplementary material for: Clonal kinetics and single-cell transcriptional profiling of CAR-T cells in patients undergoing CD19 CAR-T immunotherapy
Source: PubMed Central journal article supplement (PMC6954177; doi:10.1038/s41467-019-13880-1), 2020-01-10
Supplement: 41467_2019_13880_MOESM1_ESM.pdf [file 41467_2019_13880_MOESM1_ESM.pdf]

Clonal kinetics and single-cell transcriptional profiling of CAR-T cells  
in patients undergoing CD19 CAR-T immunotherapy

Sheih *et al.*

Supplementary Material (Figures and Tables)

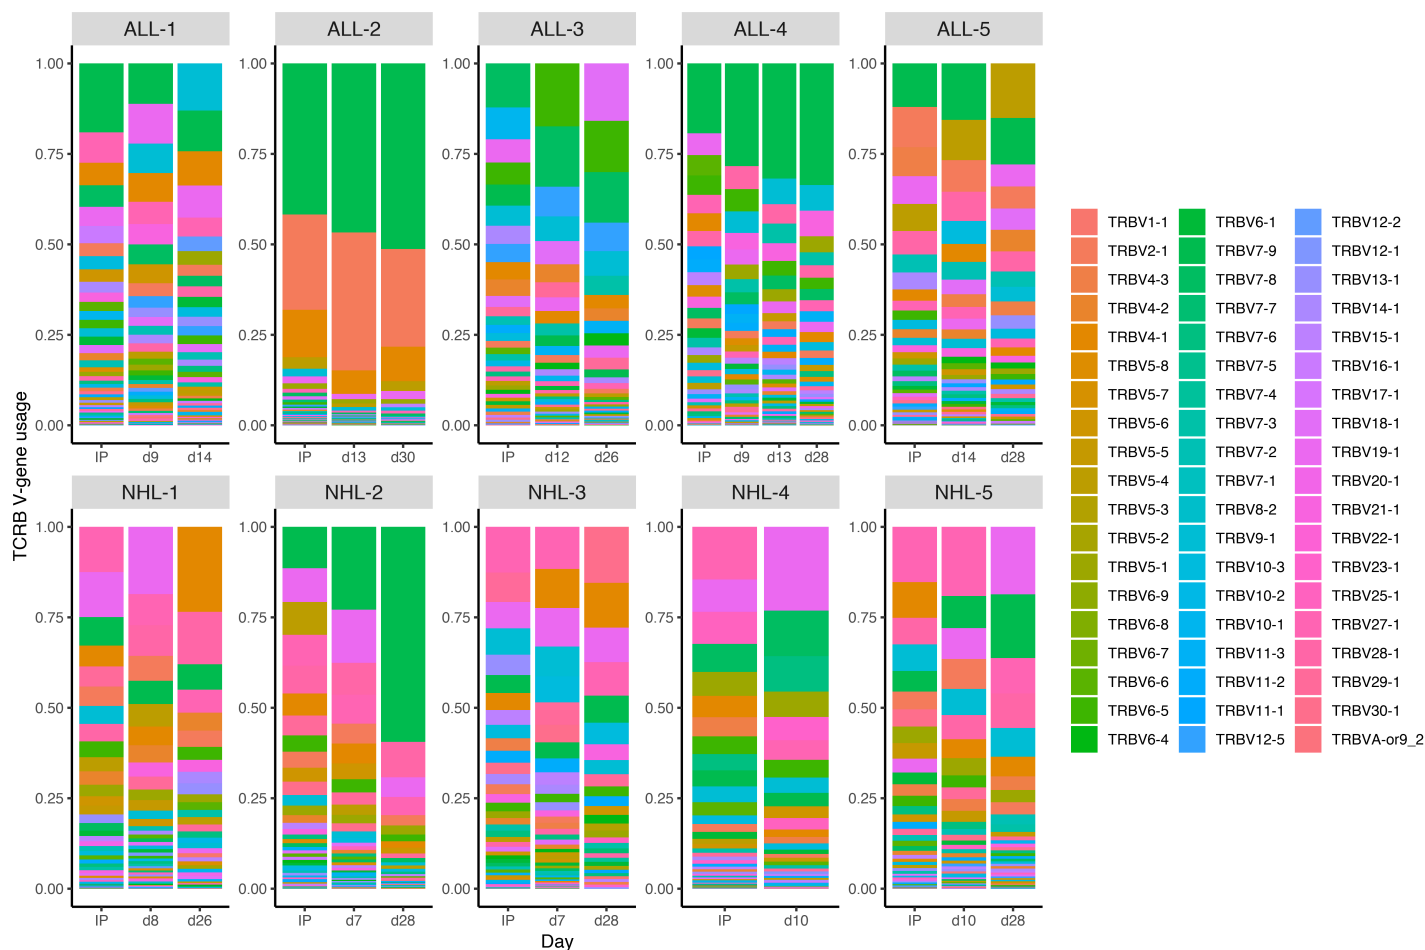

**Supplementary Figure 1. Multiple TCRB gene families are represented in CD8<sup>+</sup> CAR-T cells in the infusion product and isolated at the early and late time points after infusion.** Bars depict the proportion of CD8<sup>+</sup> CAR-T cells belonging to the indicated TCRB family. Source data are provided as a Source Data file.

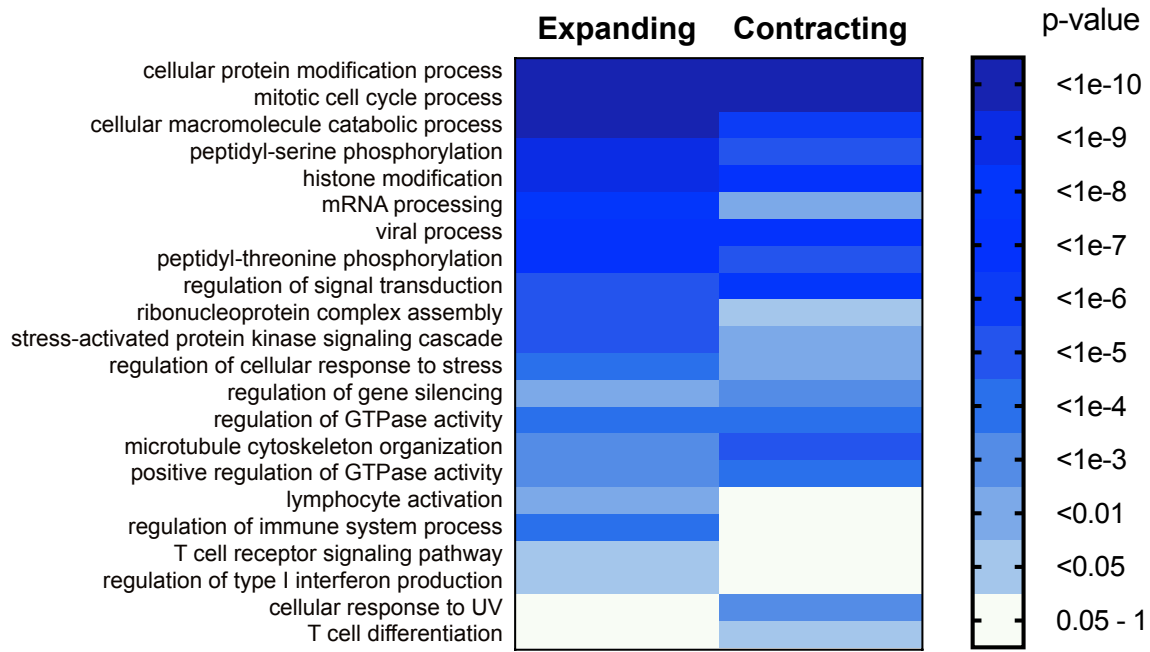

**Supplementary Figure 2.** Heatmap of biological processes identified using Gene Ontology (GO) enrichment analysis. Integration sites that either increased (Expanding) or decreased (Contracting) in relative abundance by at least 5-fold between the infusion product and in blood after adoptive transfer were identified and combined across all patients. The most significantly enriched GO categories in either expanding or contracting integration sites are plotted as a row of individual boxes and color coded based on FDR adjusted p-value. Source data are provided as a Source Data file.

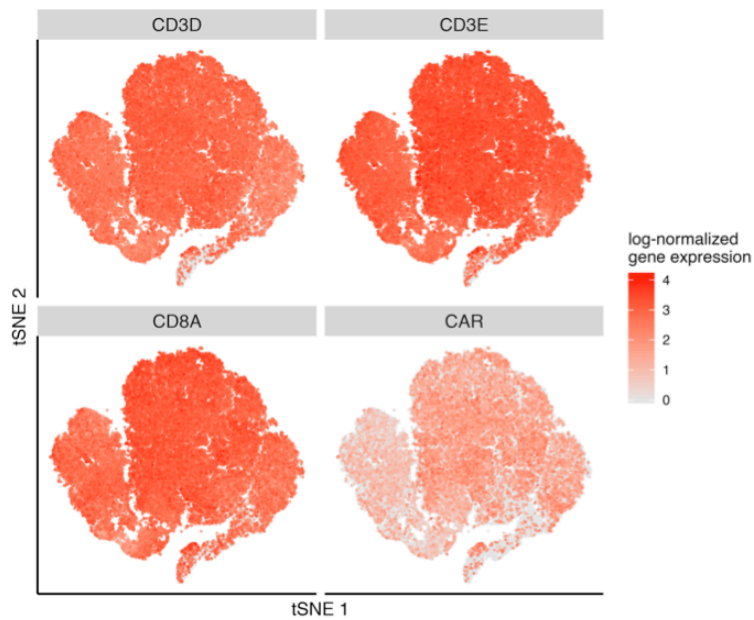

**Supplementary Figure 3.** t-SNE plot of concatenated CD8<sup>+</sup> CAR-T cells from IP, early, late, and very late time point shows log-normalized gene expression of *CD3D*, *CD3E*, *CD8A*, and scFv of the CD19 CAR construct. The scRNA-seq method only sequences and aligns the 5' end of the mRNA transcript. Given that the CAR construct can randomly integrate into the genome, this method might not detect all scFv sequences of the CD19 CAR.

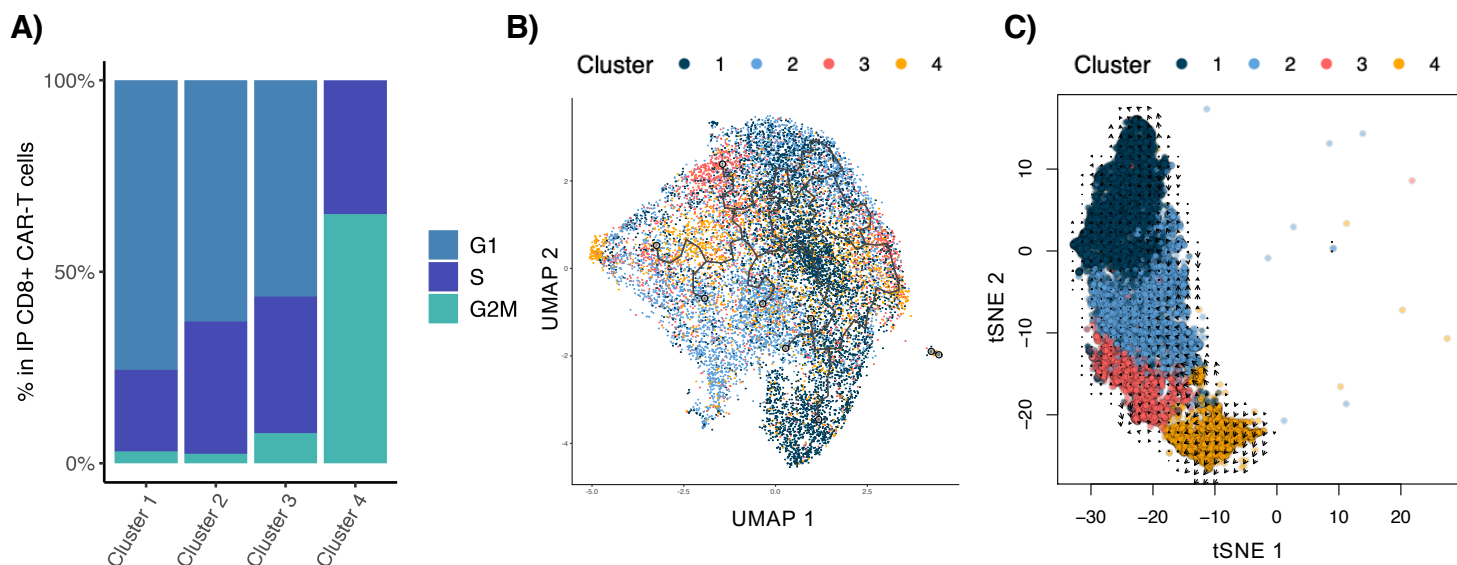

**Supplementary Figure 4.** (A) The percentage of CD8<sup>+</sup> CAR-T cells within each infusion product cluster that is predicted to be in the G1, S, or G2M phase. (B) CD8<sup>+</sup> CAR-T cells in the infusion product of all four patients were analyzed using Monocle 3 and colored based on cluster assignment. Pseudotime analysis was performed after correcting the dataset for cell cycle scores, nUMI, and the percentage of mitochondrial genes. The defined trajectories are shown as black line segments. (C) RNA velocity of CD8<sup>+</sup> CAR-T cells in the infusion product were computed and visualized on t-SNE plot. Arrows indicate the direction of the future states.

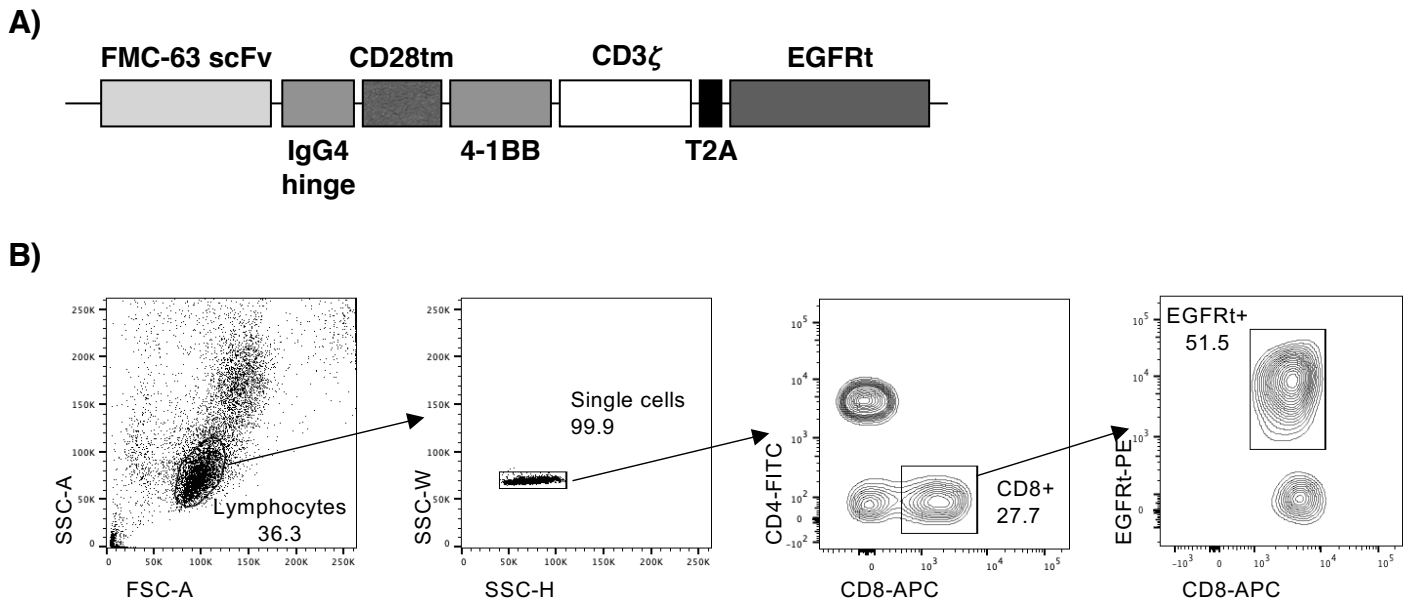

**Supplementary Figure 5.** (A) CAR construct comprising an FMC63-derived scFv, an IgG4 hinge spacer, a CD28 transmembrane domain, and 4-1BB costimulatory and CD3 $\zeta$  signaling domains, separated by a ribosomal skip sequence from a truncated human epidermal growth factor receptor (EGFRt). (B) Flow cytometry gating strategy for isolation of CD8<sup>+</sup> CAR-T cells from the infusion product and aliquots of PBMCs obtained from blood of patients after infusion. This gating strategy was used to isolate CD8<sup>+</sup> CAR-T cells for TCRB sequencing and single-cell RNA sequencing.

**Supplementary Table 1: Patient Data and Treatment Characteristics**

| ID    | Assay  | Age | Sex | CD8 T cell selection | LD     | Cell dose (EGFRt <sup>+</sup> cells/kg) | Neurotox | CRS | Outcome | DFS/PFS Status | DFS/PFS Day |
|-------|--------|-----|-----|----------------------|--------|-----------------------------------------|----------|-----|---------|----------------|-------------|
| ALL-1 | T      | 37  | F   | CD8TCM               | Cy     | 2x10 <sup>5</sup>                       | 0        | 2   | CR      | Relapse        | 66          |
| ALL-2 | T, I   | 62  | F   | CD8TCM               | Cy     | 2x10 <sup>5</sup>                       | 0        | 2   | CR      | Relapse        | 65          |
| ALL-3 | T, I   | 40  | F   | CD8TCM               | Cy/Flu | 2x10 <sup>6</sup>                       | 0        | 2   | CR      | CR Ongoing     | 1098        |
| ALL-4 | T, I   | 22  | M   | CD8TCM               | Cy/Flu | 2x10 <sup>6</sup>                       | 3        | 2   | CR      | CR Ongoing     | 765         |
| ALL-5 | T      | 24  | F   | CD8TCM               | Cy     | 2x10 <sup>5</sup>                       | 3        | 3   | CR      | Relapse        | 126         |
| NHL-1 | T      | 65  | M   | CD8TCM               | Cy/Flu | 2x10 <sup>6</sup>                       | 0        | 0   | CR      | Relapse        | 298         |
| NHL-2 | T, I   | 36  | M   | CD8TCM               | Cy/Flu | 2x10 <sup>7</sup>                       | 0        | 2   | PR      | Progression    | 58          |
| NHL-3 | T, I   | 51  | M   | CD8TCM               | Cy/Flu | 2x10 <sup>7</sup>                       | 0        | 2   | CR      | Progression    | 76          |
| NHL-4 | T      | 57  | M   | CD8TCM               | Cy/E   | 2x10 <sup>5</sup>                       | 0        | 2   | PR      | Progression    | 41          |
| NHL-5 | T      | 68  | M   | CD8TCM               | Cy/E   | 2x10 <sup>6</sup>                       | 0        | 1   | PR      | Relapse        | 274         |
| NHL-6 | 10x, I | 64  | M   | CD8TCM               | Cy/Flu | 2x10 <sup>6</sup>                       | 3        | 4   | CR      | Progression    | 285         |
| NHL-7 | 10x, I | 51  | F   | CD8TCM               | Cy/Flu | 2x10 <sup>6</sup>                       | 1        | 0   | CR      | CR Ongoing     | 393         |
| CLL-1 | 10x    | 61  | M   | CD8                  | Cy/Flu | 2x10 <sup>5</sup>                       | 0        | 0   | CR      | CR Ongoing     | 947         |
| CLL-2 | 10x    | 53  | F   | CD8                  | Cy/Flu | 2x10 <sup>6</sup>                       | 3        | 2   | CR      | CR Ongoing     | 764         |

Abbreviations: ALL, acute lymphoblastic leukemia; NHL, non-Hodgkin lymphoma; CLL, chronic lymphocytic leukemia; CD8, CD8<sup>+</sup> selection; CD8TCM, CD8<sup>+</sup> central memory selection; LD, lymphodepletion; Cy, cyclophosphamide; Flu, fludarabine; E, ectoposide; CRS, cytokine release syndrome; CR, complete response; PR, partial response; DFS, disease free survival; PFS, progression free survival. Assay: T = TCRB sequencing, I = Integration site analysis, 10x = 10x single-cell RNA-sequencing

**Supplementary Table 2:** Summary of TCRB gene sequencing results show the number of total sequences, productive sequences, unique sequences, and unique productive sequences in each sample.

| Patient ID | Time points | # total sequence | # productive sequence | # unique sequence | # unique productive sequence |
|------------|-------------|------------------|-----------------------|-------------------|------------------------------|
| ALL-1      | IP          | 607,127          | 473,848               | 3,878             | 2,886                        |
| ALL-1      | d+9         | 72,416           | 50,163                | 684               | 450                          |
| ALL-1      | d+14        | 200,649          | 139,547               | 1,025             | 687                          |
| ALL-2      | IP          | 1,053,016        | 964,806               | 1,951             | 1,442                        |
| ALL-2      | d+13        | 641,790          | 619,507               | 986               | 693                          |
| ALL-2      | d+30        | 632,432          | 604,522               | 726               | 537                          |
| ALL-3      | IP          | 4,066,871        | 2,900,108             | 6,463             | 4,687                        |
| ALL-3      | d+12        | 1,103,437        | 741,188               | 1,780             | 1,218                        |
| ALL-3      | d+26        | 1,527,475        | 992,531               | 1,784             | 1,198                        |
| ALL-4      | IP          | 1,609,425        | 1,275,942             | 3,367             | 2,409                        |
| ALL-4      | d+9         | 1,355,112        | 1,122,364             | 2,112             | 1,458                        |
| ALL-4      | d+13        | 221,716          | 172,460               | 814               | 517                          |
| ALL-4      | d+28        | 339,060          | 269,378               | 874               | 549                          |
| ALL-5      | IP          | 679,436          | 537,441               | 3,325             | 2,524                        |
| ALL-5      | d+14        | 126,228          | 100,344               | 867               | 623                          |
| ALL-5      | d+28        | 112,494          | 84,833                | 670               | 425                          |
| NHL-1      | IP          | 3,450,345        | 2,726,823             | 13,262            | 10,313                       |
| NHL-1      | d+8         | 11,949           | 7,403                 | 442               | 262                          |
| NHL-1      | d+26        | 19,880           | 9,164                 | 344               | 130                          |
| NHL-2      | IP          | 2,036,531        | 1,662,817             | 11,524            | 9,171                        |
| NHL-2      | d+7         | 208,473          | 177,457               | 1,507             | 1,067                        |
| NHL-2      | d+28        | 210,127          | 180,691               | 812               | 516                          |
| NHL-3      | IP          | 2,494,719        | 2,017,132             | 6,391             | 4,923                        |
| NHL-3      | d+7         | 100,134          | 76,748                | 887               | 575                          |
| NHL-3      | d+28        | 6,839            | 3,234                 | 250               | 93                           |
| NHL-4      | IP          | 855,310          | 664,541               | 2,889             | 2,271                        |
| NHL-4      | d+10        | 673,456          | 531,125               | 1,113             | 829                          |
| NHL-5      | IP          | 1,754,834        | 1,292,267             | 5,923             | 4,464                        |
| NHL-5      | d+10        | 348,178          | 237,196               | 778               | 546                          |
| NHL-5      | d+28        | 942,357          | 586,423               | 1,641             | 1,119                        |



**Supplementary Table 3: Gene sets used for gene set enrichment analysis in transcriptional profiling of single CD8<sup>+</sup> CAR-T cells**

| BTM - T cell activation (II) | KEGG - Citrate Cycle TCA Cycle | KEGG - Oxidative Phosphorylation | Tem/eff>Tn/Tcm (Willinger 2005) | Exhaustion (Wherry 2007) | Exhaustion (Long 2015) |
|------------------------------|--------------------------------|----------------------------------|---------------------------------|--------------------------|------------------------|
| CCL5                         | ACLY                           | ATP12A                           | KLRF1                           | TNFSF6                   | KIAA1324               |
| SP140                        | ACO1                           | ATP4A                            | SLCO4C1                         | PBX3                     | FN1                    |
| TIGIT                        | ACO2                           | ATP4B                            | CX3CR1                          | GP49B                    | ITGA9                  |
| CD247                        | CS                             | ATP5A1                           | CD160                           | CD244                    | SMPDL3A                |
| CCR5                         | DLAT                           | ATP5B                            | GZMA                            | CCL3                     | ITPRIPL2               |
| NLRC3                        | DLD                            | ATP5C1                           | CD244                           | EOMES                    | PRSS23                 |
| PTPRCAP                      | DLST                           | ATP5D                            | HLA-DRA                         | CASP3                    | CLECL1                 |
| STAT4                        | FH                             | ATP5E                            | PTGDR                           | PLSCR1                   | GRB10                  |
| IL12RB1                      | IDH1                           | ATP5F1                           | CCL4                            | KDT1                     | KIF21A                 |
| TRAT1                        | IDH2                           | ATP5G1                           | PRF1                            | CTLA4                    | CTLA4                  |
| SLA2                         | IDH3A                          | ATP5G1P5                         | CHST12                          | PDCD1                    | ATP10D                 |
| CXCR3                        | IDH3B                          | ATP5G2                           | KLRD1                           | IER5                     | NUDT16                 |
| ZAP70                        | IDH3G                          | ATP5G3                           | PTGDS                           | RGS16                    | PLD1                   |
| NKG7                         | LOC283398                      | ATP5H                            | APOBEC3G                        | A430109M19RIK            | LGMN                   |
| SIRPG                        | LOC642502                      | ATP5I                            | KLRA1                           | TNFRSF9                  | SASH1                  |
| ICOS                         | MDH1                           | ATP5J                            | CD300A                          | PENK1                    | ZNF704                 |
| IFNG                         | MDH2                           | ATP5J2                           | NKG7                            | EOMES                    | PLEKHH2                |
| IL18R1                       | OGDH                           | ATP5L                            | FGR                             | COCH                     | CTHRC1                 |
| SLAMF7                       | OGDHL                          | ATP5O                            | PLCG2                           | PTPN13                   | ID1                    |
| PTPN7                        | PC                             | ATP6                             | CTSC                            | TCRG-V4                  | FAXC                   |
| ITK                          | PCK1                           | ATP6AP1                          | CST7                            | NR4A2                    | EGR1                   |
| CRTAM                        | PCK2                           | ATP6V0A1                         | PTGER2                          | CD160                    | TNFSF11                |
| GZMA                         | PDHA1                          | ATP6V0A2                         | HLA-DPA1                        | PTGER4                   | PTGIS                  |
| CD3E                         | PDHA2                          | ATP6V0A4                         | HLA-DRB1                        | CCL4                     | KLRC1/KLRC2            |
| GPR171                       | PDHB                           | ATP6V0B                          | CD58                            | WBP5                     | CD38                   |
| TARP                         | SDHA                           | ATP6V0C                          | DMN                             | GPR56                    | RBM47                  |
| CD3D                         | SDHB                           | ATP6V0D1                         | GZMK                            | 1110067D22RIK            | SPINK2                 |
| LCK                          | SDHC                           | ATP6V0D2                         | GOLPH3L                         | ENTPD1                   | AKAP5                  |
| SLAMF1                       | SDHD                           | ATP6V0E1                         | TNFRSF9                         | SH2D2A                   | ENTPD1                 |
| CD3G                         | SUCLA2                         | ATP6V0E2                         | KIF11                           | SEPT4                    |                        |
|                              | SUCLG1                         | ATP6V1A                          | AOAH                            | ISG20                    |                        |
|                              | SUCLG2                         | ATP6V1B1                         | POU2AF1                         | TRIM47                   |                        |
|                              |                                | ATP6V1B2                         | RRBP1                           | SERPINA3G                |                        |
|                              |                                | ATP6V1C1                         | FLJ14213                        | CASP4                    |                        |
|                              |                                | ATP6V1C2                         | VCAM1                           | 9130009C22RIK            |                        |
|                              |                                | ATP6V1D                          | JAKMIP2                         | C79248                   |                        |
|                              |                                | ATP6V1E1                         | FLJ11151                        | LAG3                     |                        |
|                              |                                | ATP6V1E2                         | HLA-DQA1                        | NR4A2                    |                        |
|                              |                                | ATP6V1F                          | SMC2                            | NFTAC1                   |                        |
|                              |                                | ATP6V1G1                         | CTNNA1                          | CAR2                     |                        |
|                              |                                | ATP6V1G2                         | CRTAM                           | C330007P06RIK            |                        |
|                              |                                | ATP6V1G3                         |                                 | GPD2                     |                        |
|                              |                                | ATP6V1H                          |                                 | 2700084L22RIK            |                        |
|                              |                                | ATP8                             |                                 | RNF11                    |                        |
|                              |                                | COX1                             |                                 | CAPZB                    |                        |
|                              |                                | COX10                            |                                 | TUBB2                    |                        |
|                              |                                | COX11                            |                                 | BUB1                     |                        |
|                              |                                | COX15                            |                                 | JAK3                     |                        |
|                              |                                | COX17                            |                                 | 9130410M22RIK            |                        |
|                              |                                | COX2                             |                                 | CD9                      |                        |

| BTM - T cell activation (II) | KEGG - Citrate Cycle TCA Cycle | KEGG - Oxidative Phosphorylation | Tem/eff>Tn/Tcm (Willinger 2005) | Exhaustion (Wherry 2007) | Exhaustion (Long 2015) |
|------------------------------|--------------------------------|----------------------------------|---------------------------------|--------------------------|------------------------|
|                              |                                | COX3                             |                                 | TCRG-V4                  |                        |
|                              |                                | COX4I1                           |                                 | 1810054D07RIK            |                        |
|                              |                                | COX4I2                           |                                 | RCN                      |                        |
|                              |                                | COX5A                            |                                 | 2010100O12RIK            |                        |
|                              |                                | COX5B                            |                                 | SYBL1                    |                        |
|                              |                                | COX6A1                           |                                 | ETF1                     |                        |
|                              |                                | COX6A2                           |                                 | CPA3                     |                        |
|                              |                                | COX6B1                           |                                 | CD7                      |                        |
|                              |                                | COX6B2                           |                                 | ART3                     |                        |
|                              |                                | COX6C                            |                                 | 1810035L17RIK            |                        |
|                              |                                | COX6CP3                          |                                 | ATF1                     |                        |
|                              |                                | COX7A1                           |                                 | PRKWINK1                 |                        |
|                              |                                | COX7A2                           |                                 | MTV43                    |                        |
|                              |                                | COX7A2L                          |                                 | CIT                      |                        |
|                              |                                | COX7B                            |                                 | CCRL2                    |                        |
|                              |                                | COX7B2                           |                                 | ADFP                     |                        |
|                              |                                | COX7C                            |                                 | D8ERTD531E               |                        |
|                              |                                | COX8A                            |                                 | TCEA2                    |                        |
|                              |                                | COX8C                            |                                 | MYH4                     |                        |
|                              |                                | CYC1                             |                                 | TNFRSF1A                 |                        |
|                              |                                | CYTB                             |                                 | SPP1                     |                        |
|                              |                                | LHPP                             |                                 | S100A13                  |                        |
|                              |                                | LOC100133737                     |                                 | PON2                     |                        |
|                              |                                | LOC642502                        |                                 | AI181996                 |                        |
|                              |                                | LOC644310                        |                                 | G1P2                     |                        |
|                              |                                | LOC727947                        |                                 | TANK                     |                        |
|                              |                                | ND1                              |                                 | SHKBP1                   |                        |
|                              |                                | ND2                              |                                 | 2510004LORIK             |                        |
|                              |                                | ND3                              |                                 | D15ERTD781E              |                        |
|                              |                                | ND4                              |                                 | ICSBP1                   |                        |
|                              |                                | ND4L                             |                                 | BC024955                 |                        |
|                              |                                | ND5                              |                                 | GDF3                     |                        |
|                              |                                | ND6                              |                                 | ITGAV                    |                        |
|                              |                                | NDUFA1                           |                                 | 1110006I15RIK            |                        |
|                              |                                | NDUFA10                          |                                 | CPSF2                    |                        |
|                              |                                | NDUFA11                          |                                 | KLK6                     |                        |
|                              |                                | NDUFA2                           |                                 | CPT2                     |                        |
|                              |                                | NDUFA3                           |                                 | LMAN2                    |                        |
|                              |                                | NDUFA4                           |                                 | TOR3A                    |                        |
|                              |                                | NDUFA4L2                         |                                 | CRYGB                    |                        |
|                              |                                | NDUFA5                           |                                 | GPR65                    |                        |
|                              |                                | NDUFA6                           |                                 | MKI67                    |                        |
|                              |                                | NDUFA7                           |                                 | TCRB-V13                 |                        |
|                              |                                | NDUFA8                           |                                 | NPTXR                    |                        |
|                              |                                | NDUFA9                           |                                 | SNRPB2                   |                        |
|                              |                                | NDUFAB1                          |                                 | NDFIP1                   |                        |
|                              |                                | NDUFB1                           |                                 | PTGER2                   |                        |
|                              |                                | NDUFB10                          |                                 | ZFP91                    |                        |
|                              |                                | NDUFB2                           |                                 | SPOCK2                   |                        |
|                              |                                | NDUFB3                           |                                 | 5730469M10RIK            |                        |
|                              |                                | NDUFB4                           |                                 | CXCL10                   |                        |
|                              |                                | NDUFB5                           |                                 | GCIN                     |                        |
|                              |                                | NDUFB6                           |                                 | TRIM25                   |                        |
|                              |                                | NDUFB7                           |                                 | WBSCR5                   |                        |
|                              |                                | NDUFB8                           |                                 | MOX2                     |                        |

| BTM - T cell activation (II) | KEGG - Citrate Cycle TCA Cycle | KEGG - Oxidative Phosphorylation | Tem/eff>Tn/Tcm (Willinger 2005) | Exhaustion (Wherry 2007) | Exhaustion (Long 2015) |
|------------------------------|--------------------------------|----------------------------------|---------------------------------|--------------------------|------------------------|
|                              |                                | NDUFB9                           |                                 | DOCK7                    |                        |
|                              |                                | NDUFC1                           |                                 | PAWR                     |                        |
|                              |                                | NDUFC2                           |                                 | CHL1                     |                        |
|                              |                                | NDUFS1                           |                                 |                          |                        |
|                              |                                | NDUFS2                           |                                 |                          |                        |
|                              |                                | NDUFS3                           |                                 |                          |                        |
|                              |                                | NDUFS4                           |                                 |                          |                        |
|                              |                                | NDUFS5                           |                                 |                          |                        |
|                              |                                | NDUFS6                           |                                 |                          |                        |
|                              |                                | NDUFS7                           |                                 |                          |                        |
|                              |                                | NDUFS8                           |                                 |                          |                        |
|                              |                                | NDUFV1                           |                                 |                          |                        |
|                              |                                | NDUFV2                           |                                 |                          |                        |
|                              |                                | NDUFV3                           |                                 |                          |                        |
|                              |                                | PPA1                             |                                 |                          |                        |
|                              |                                | PPA2                             |                                 |                          |                        |
|                              |                                | SDHA                             |                                 |                          |                        |
|                              |                                | SDHB                             |                                 |                          |                        |
|                              |                                | SDHC                             |                                 |                          |                        |
|                              |                                | SDHD                             |                                 |                          |                        |
|                              |                                | TCIRG1                           |                                 |                          |                        |
|                              |                                | UQCR10                           |                                 |                          |                        |
|                              |                                | UQCR11                           |                                 |                          |                        |
|                              |                                | UQCRB                            |                                 |                          |                        |
|                              |                                | UQCRC1                           |                                 |                          |                        |
|                              |                                | UQCRC2                           |                                 |                          |                        |
|                              |                                | UQCRFS1                          |                                 |                          |                        |
|                              |                                | UQCRH                            |                                 |                          |                        |
|                              |                                | UQCRHL                           |                                 |                          |                        |
|                              |                                | UQCRQ                            |                                 |                          |                        |

**Supplementary Table 4:** Number of IRF/DRF clonotypes and CAR-T cells identified in NHL-6 and NHL-7

|       | IRF<br>Clonotypes | IRF<br>CAR-T cells | DRF<br>Clonotypes | DRF<br>CAR-T cells |
|-------|-------------------|--------------------|-------------------|--------------------|
| NHL-6 | 29                | 322                | 67                | 1187               |
| NHL-7 | 19                | 40                 | 59                | 1447               |

IRF: Increased relative frequency in blood compared to the infused product

DRF: Decreased relative frequency in blood compared to the infused product

IRF clonotypes were identified as clones in the IP whose relative frequency at the early time point was significantly higher compared to the relative frequency in the IP (Fisher's exact test, FDR of 5%). DRF clonotypes were identified as clones in the IP whose relative frequency at the early time point was significantly lower compared to the relative frequency in the IP (Fisher's exact test, FDR of 5%).

**Supplementary Table 5: Primers used in amplification of integration loci**

| <b>Oligonucleotide</b>                      | <b>Sequence</b>                                                  |
|---------------------------------------------|------------------------------------------------------------------|
| Lentivirus LTR Primer (1 <sup>st</sup> PCR) | 5'-TCGTCGGCAGCGTCAGATGTGTATAAGAGACAGAGCTTGCCTTGAGTGCTTCAAGTAG-3' |
| Lentivirus LTR Primer (2 <sup>nd</sup> PCR) | 5'-[Sample-specific Barcode]-AGTAGTGTGTGCCCGTCTGT-3'             |
| Linker Cassette Sense                       | 5'-GACCCGGGAGATCTGAATTCAGTGGCACAGCAGTTAGG-3'                     |
| Linker Cassette Antisense                   | 5'-CCTAACTGCTGTGCCACTGAATTCAGATC-3'                              |
| Linker Cassette Primer                      | 5'-GTCTCGTGGGCTCGGAGATGTGTATAAGAGACAGGATCTGAATTCAGTGGCACAG-3'    |
